# Supplementary material for: No Causal Association Identified for Human Papillomavirus Infections in Lung Cancer
Source: Oxford University Press journal article supplement (doi:10.1158/0008-5472.can-13-3548), 2014-04-24
Supplement: 00085472can133548-sup-tab2.pdf [file 00085472can133548-sup-tab2.pdf]

Supplementary table 2:Antibodies to type-specific HPV proteins and the risk of lung cancer

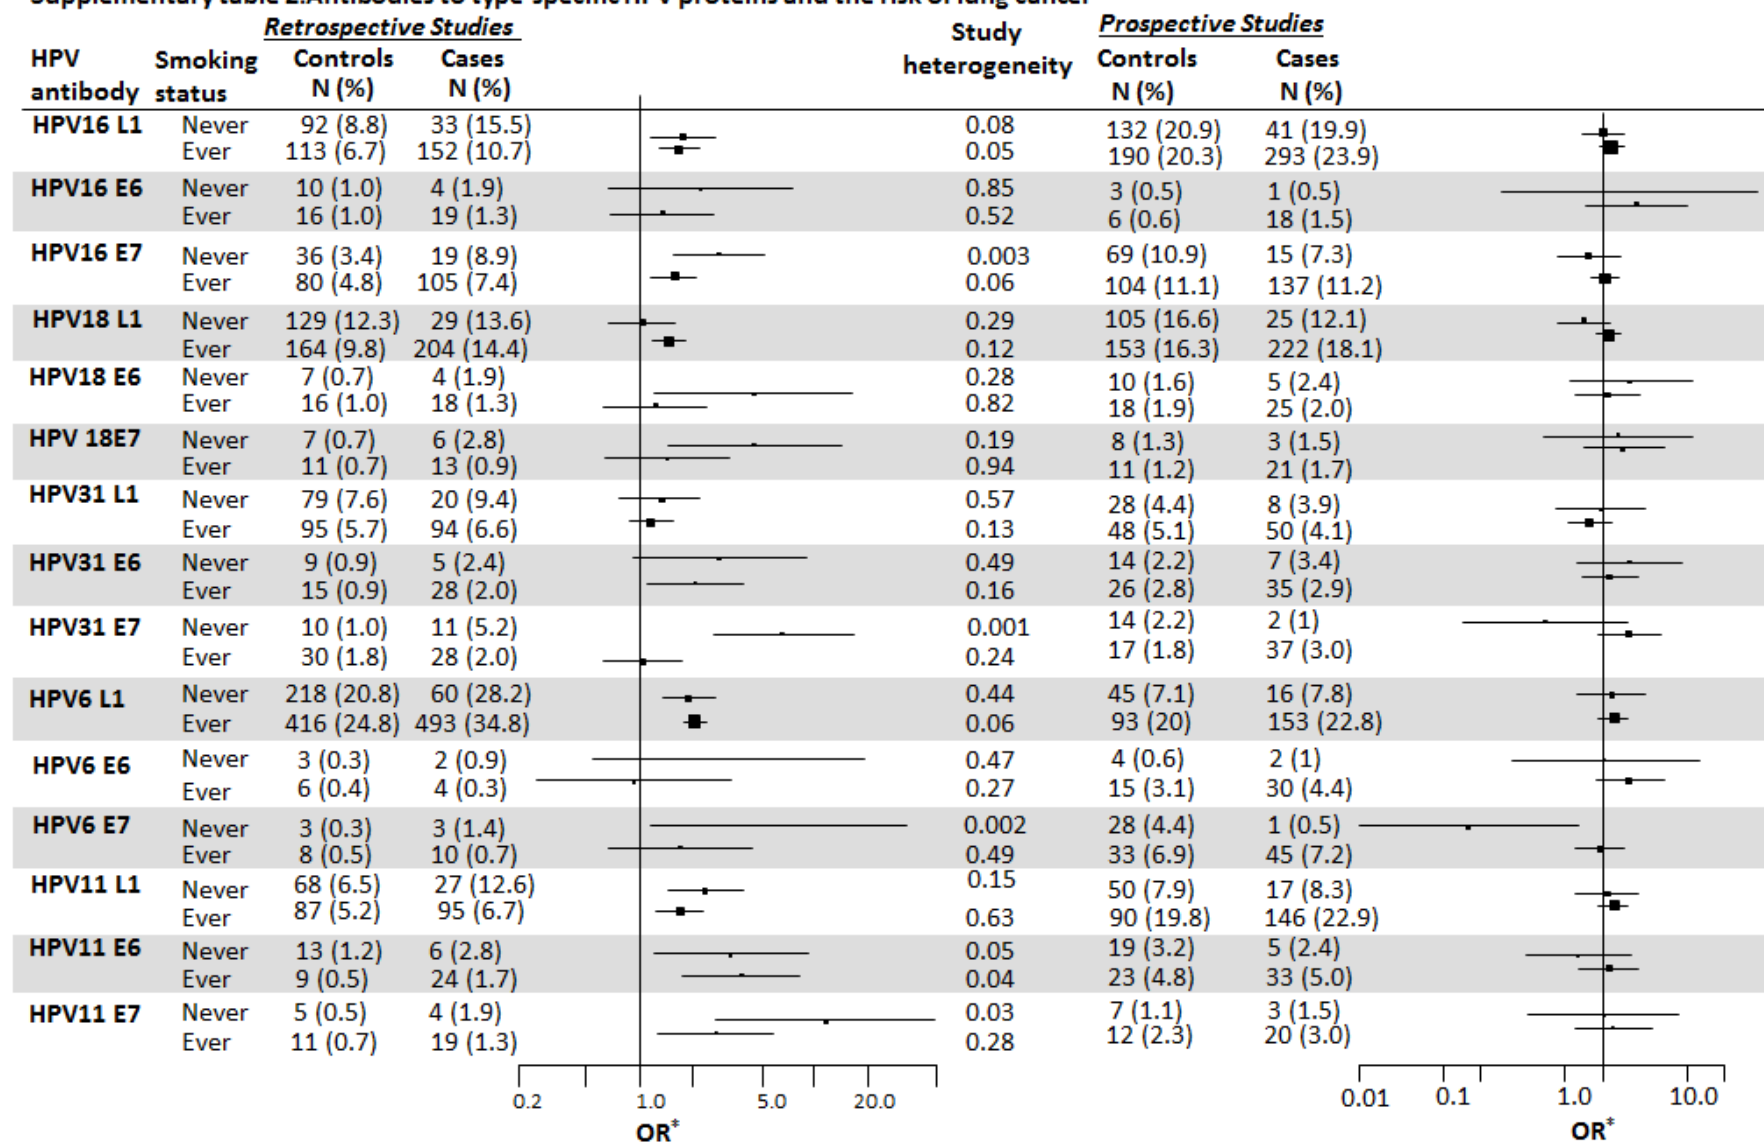

\*ORs were adjusted for age, sex, country and smoking. Corresponding HPV seronegative category was considered the reference
